# Supplementary material for: Interplay between bacterial deubiquitinase and ubiquitin E3 ligase regulates ubiquitin dynamics on Legionella phagosomes
Source: eLife journal article supplement (doi:10.7554/elife.58114), 2020-11-02

**a**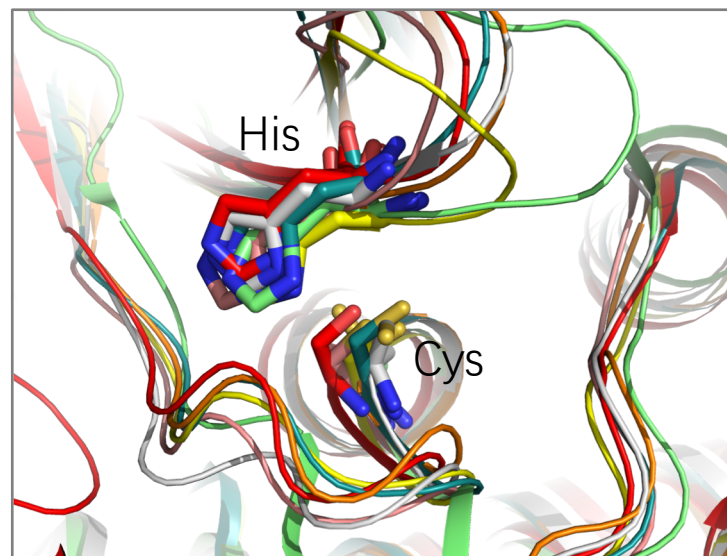

Lem27 V N M F N V D N S G K G N C L Y Y A Y S I S L M Y Y  
 6KS5 V E N A V D V S G A F D N C F F H N F A L Y L L T N  
 3PHU D Y F E I V R Q P G D G N C F Y H S I A E L T M P N  
 3TMP K G F I I K Q M K E D G A C L F R A V A D Q V Y G D

**b**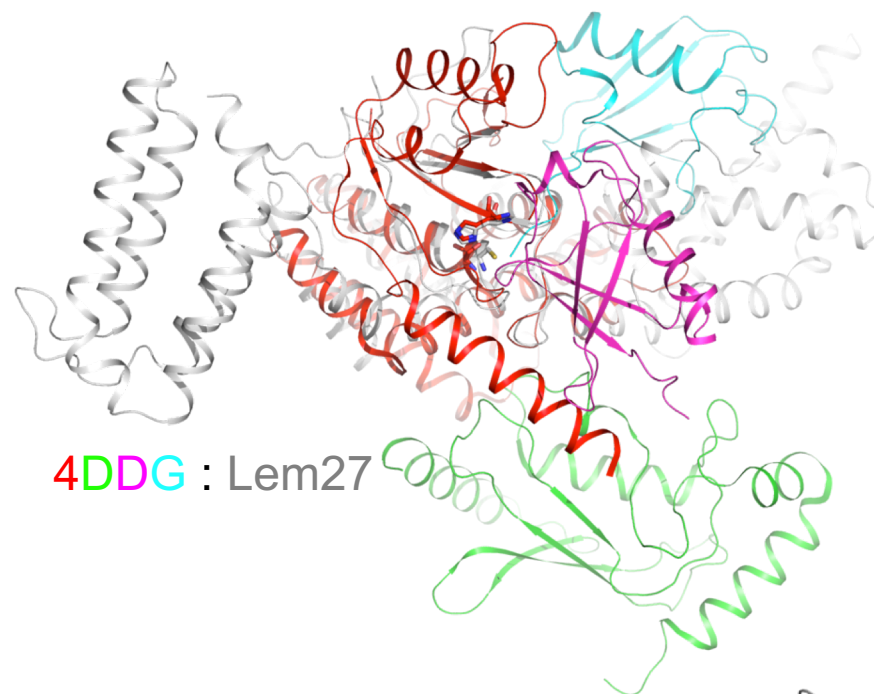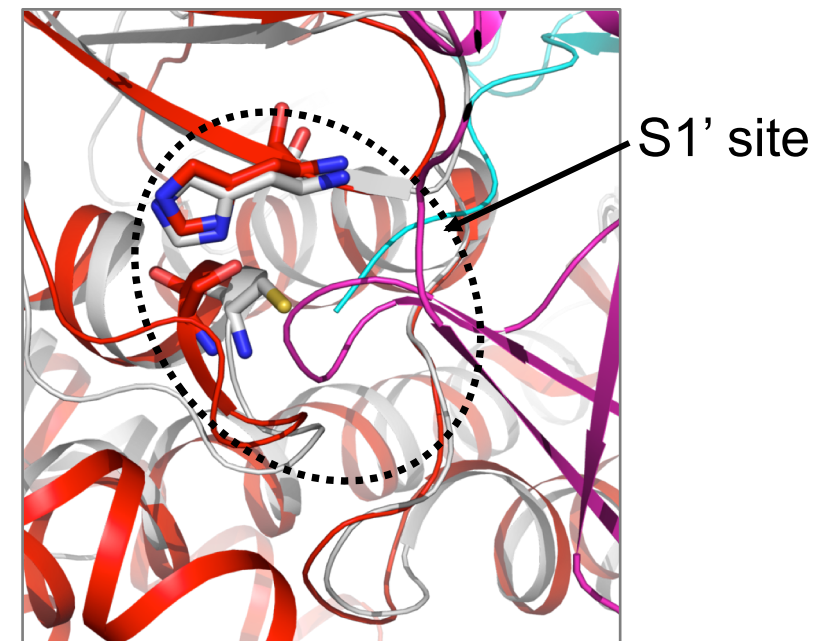**c**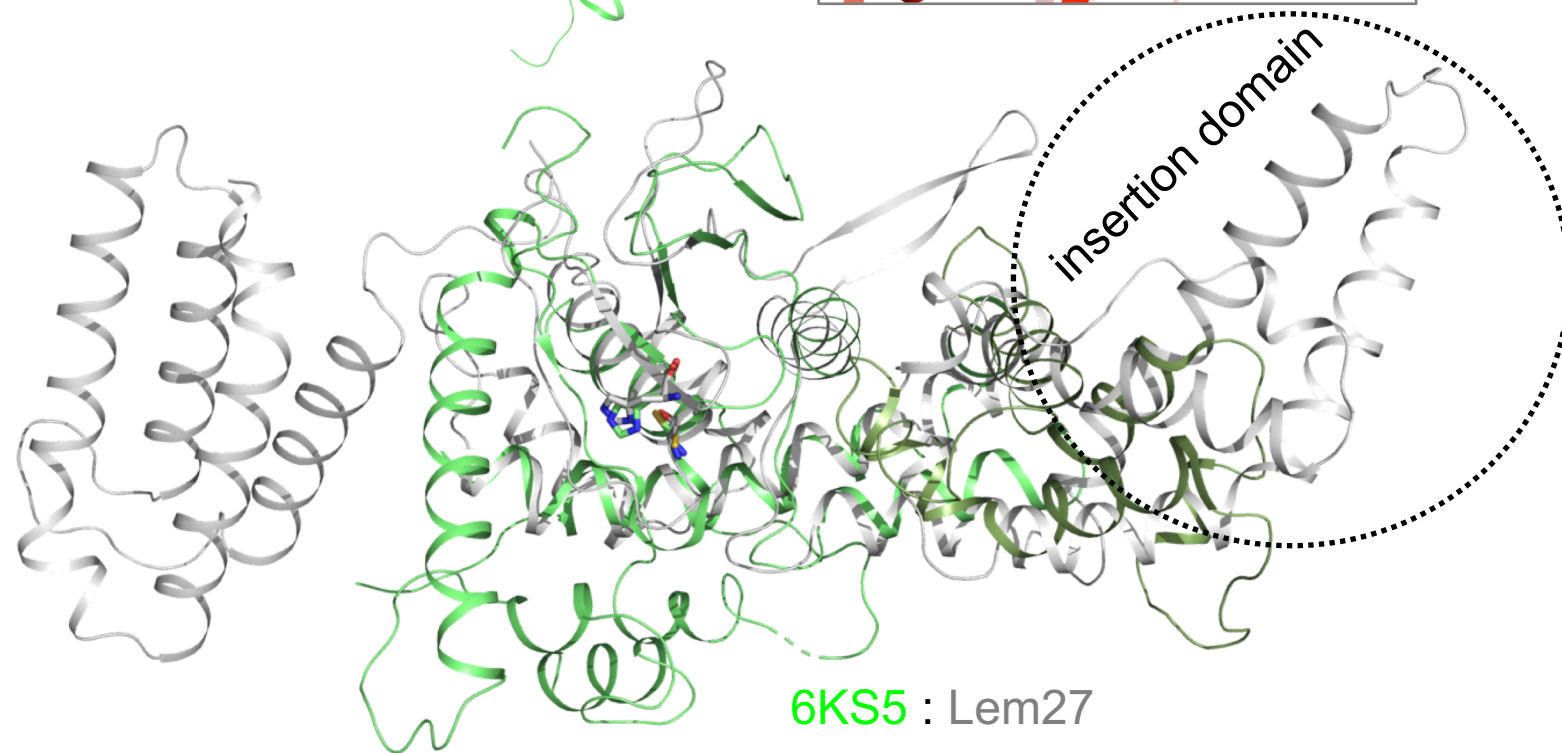

Supplement: supp [file elife-58114-supp-v1.zip]
