# Supplementary figures and images for: Interplay between bacterial deubiquitinase and ubiquitin E3 ligase regulates ubiquitin dynamics on Legionella phagosomes
Source: eLife journal article supplement (doi:10.7554/elife.58114), 2020-11-02

**a**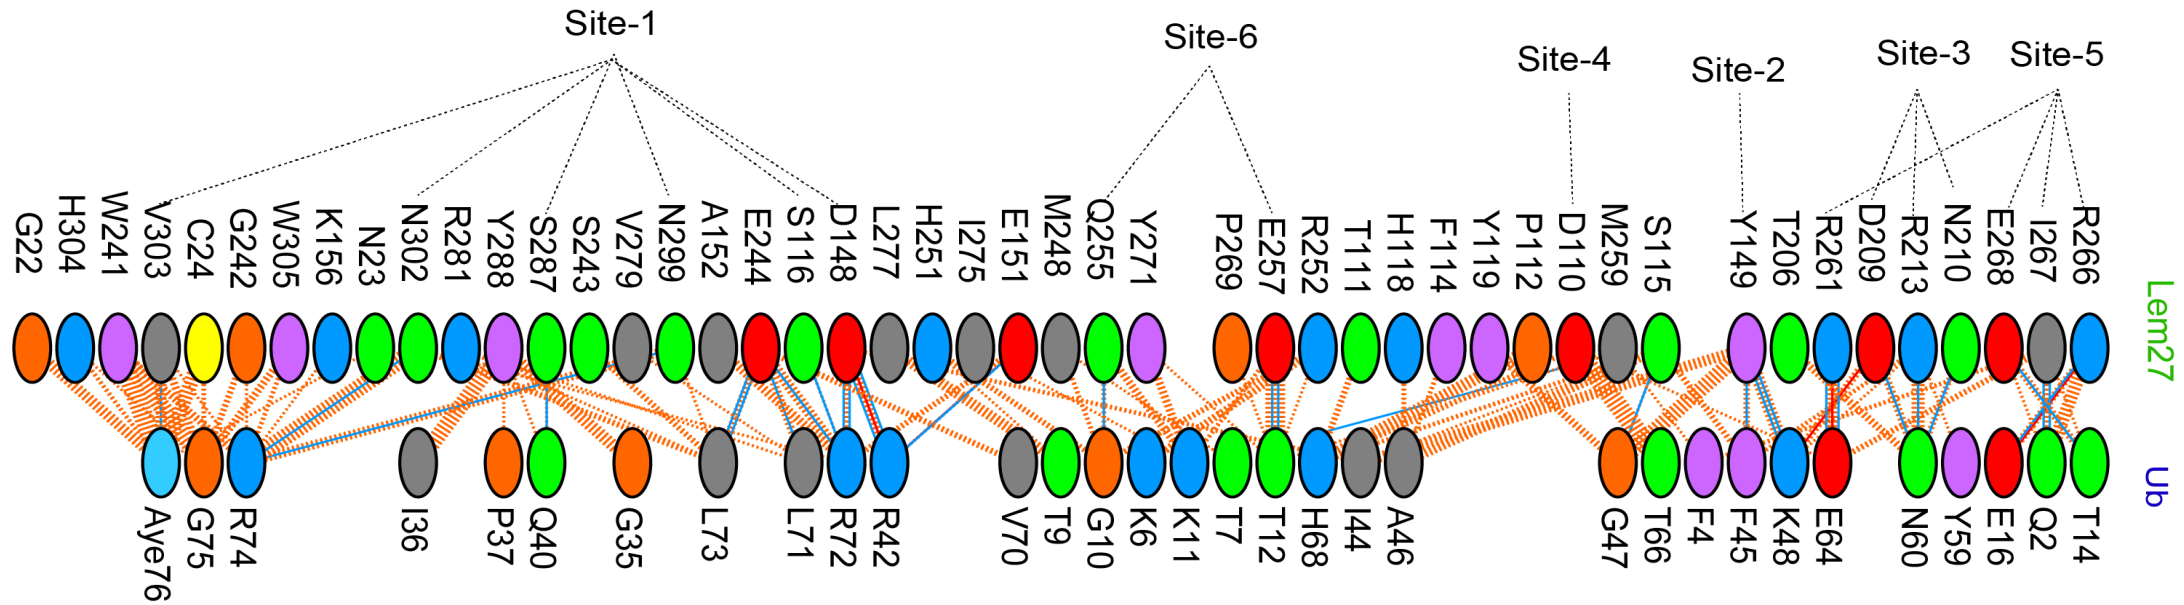**b**

— Hydrogen bonds — Non-bonded contacts — Salt bridges

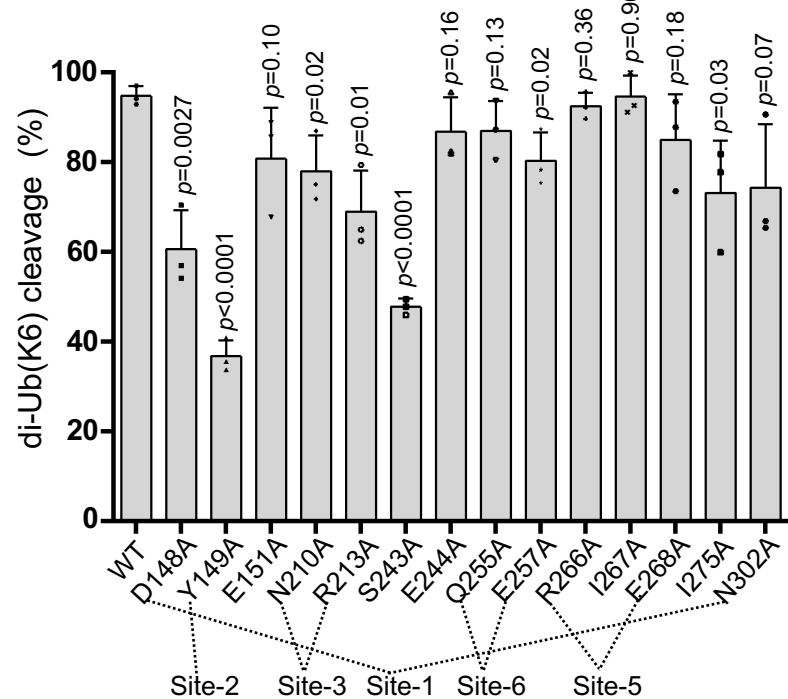

Supplement: supp [file elife-58114-supp-v1.zip]

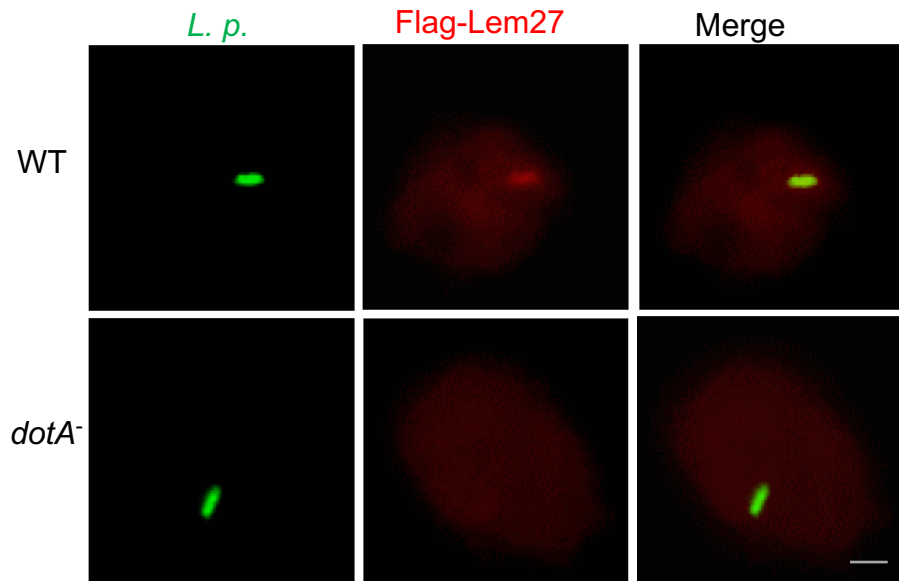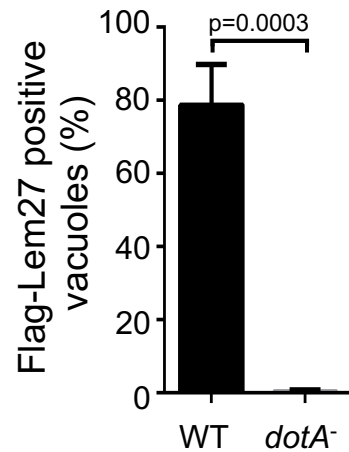

Supplement: supp [file elife-58114-supp-v1.zip]

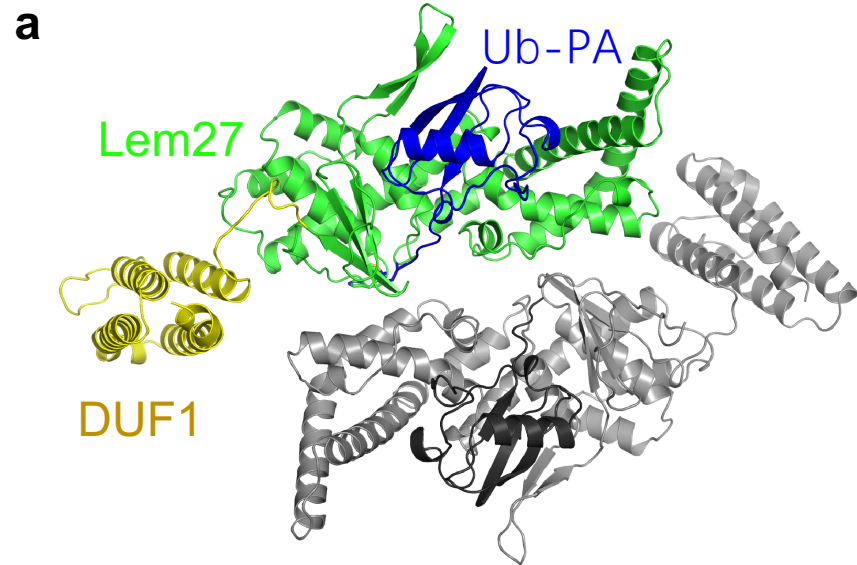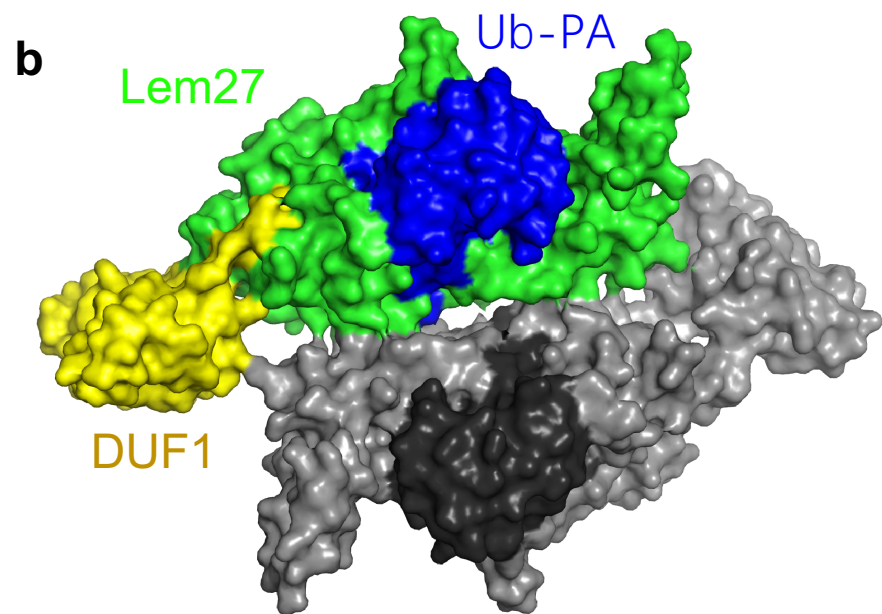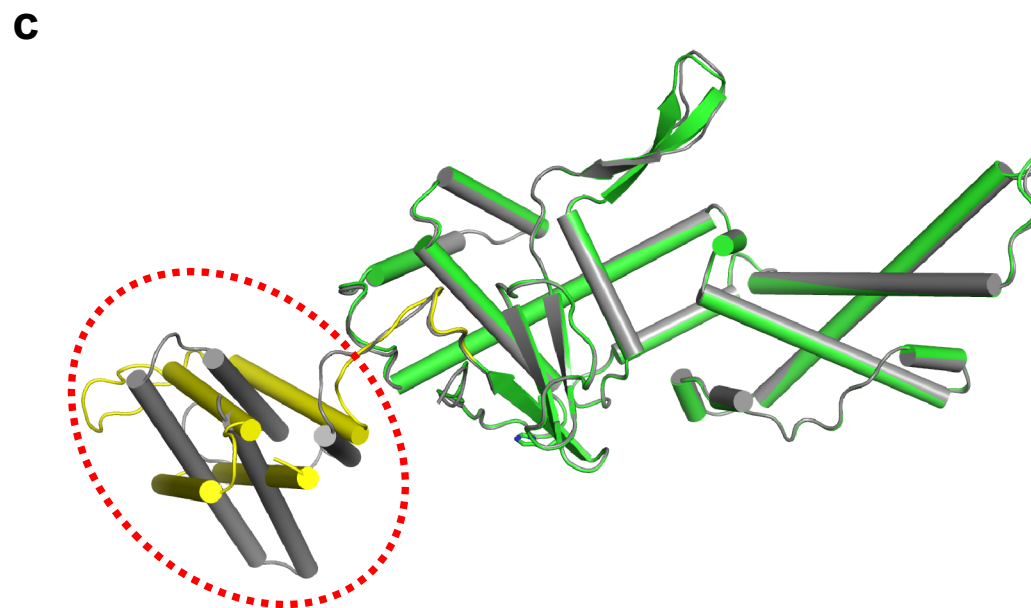

Supplement: supp [file elife-58114-supp-v1.zip]

**a**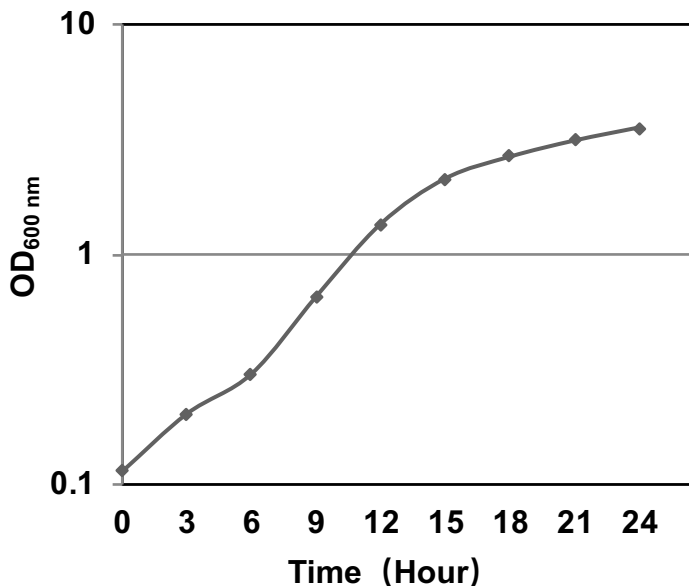**b**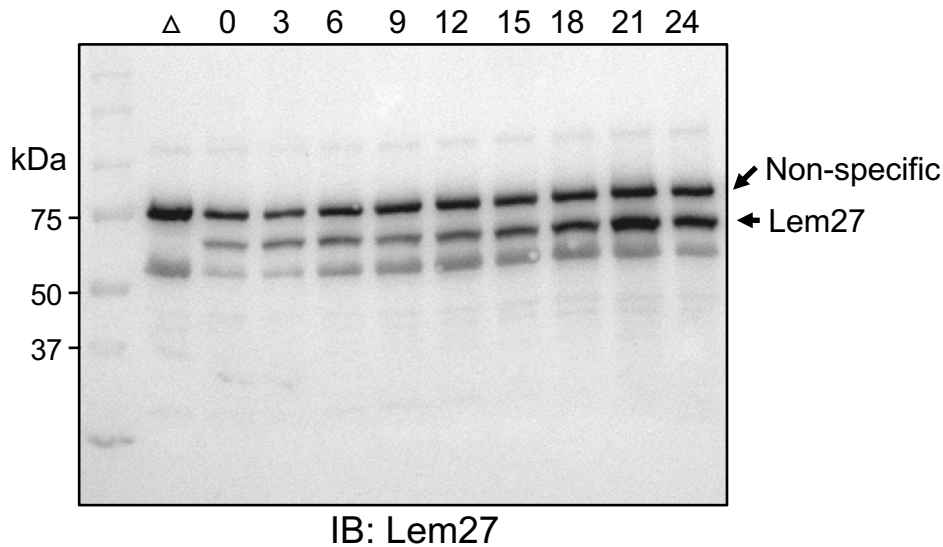

Supplement: supp [file elife-58114-supp-v1.zip]

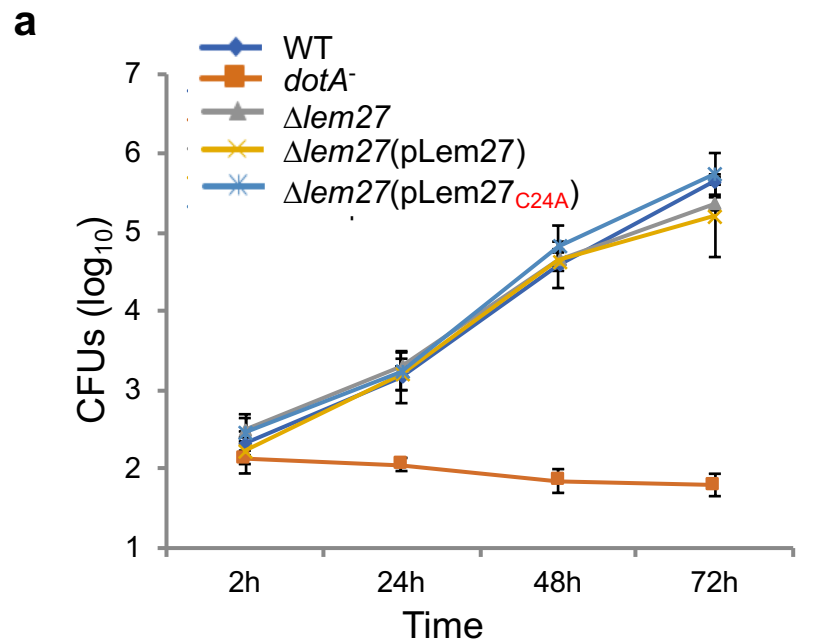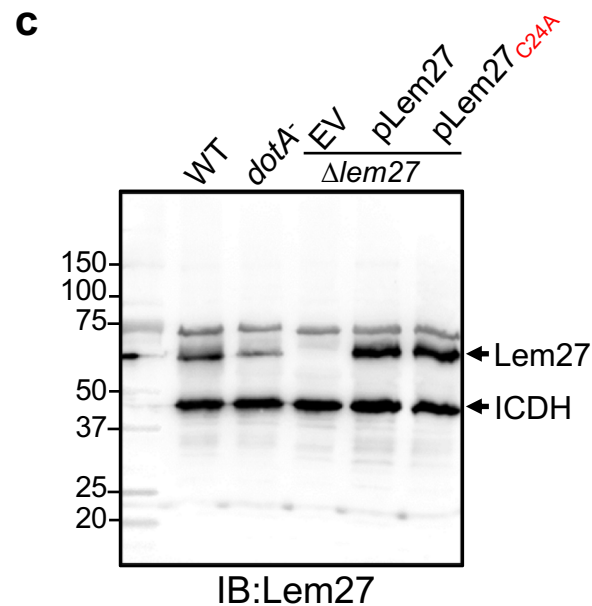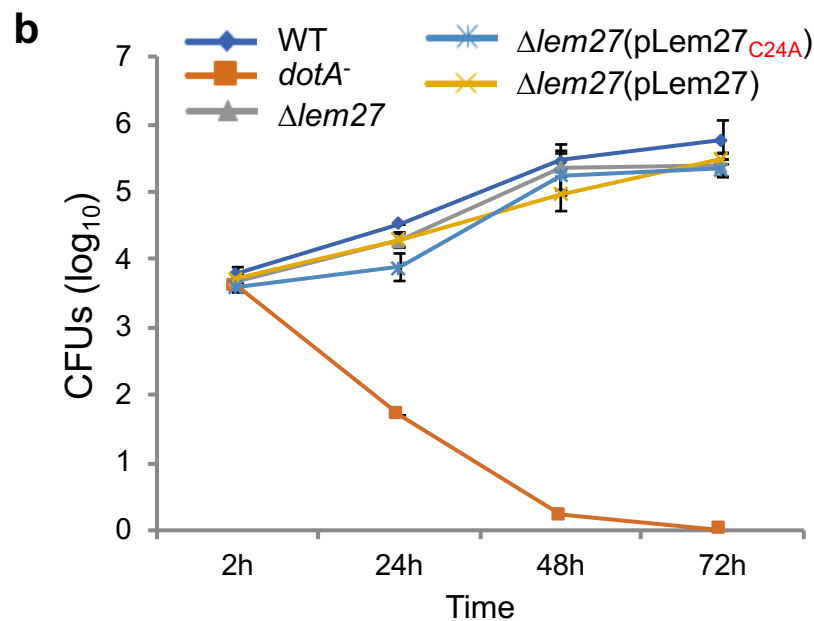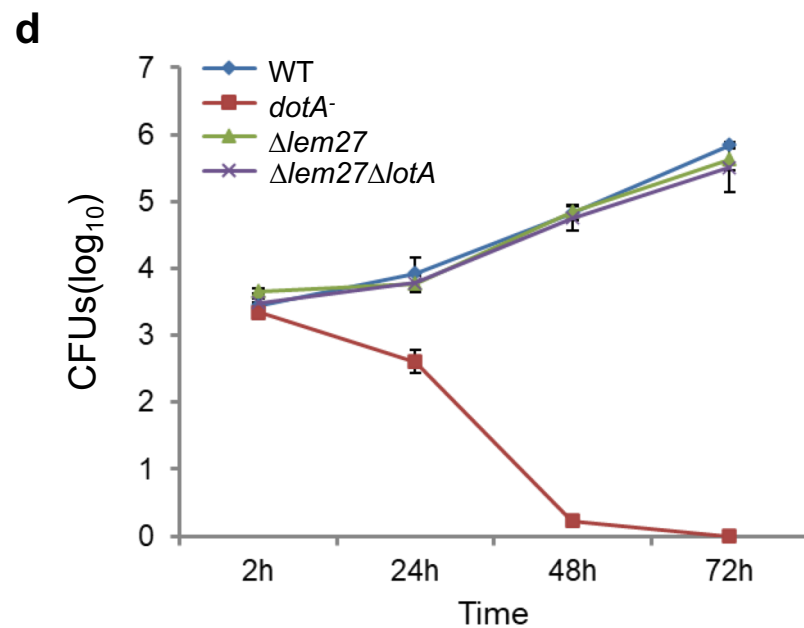

Supplement: supp [file elife-58114-supp-v1.zip]
